# Supplementary material
Source: MDPI journal article supplement (https://www.mdpi.com/2071-1050/9/6/1034)
Supplement: s1 [file s1]

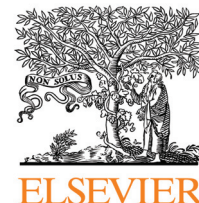

**Language Editing Services**

*Registered Office:*

Elsevier Ltd

The Boulevard, Langford Lane,

Kidlington, OX5 1GB, UK.

Registration No. 331566771

**To whom it may concern**

The paper "Public Response to the Regulation Policy of Urban Household Waste: Evidence from a Survey of Jiangsu Province in China" by Hong Chen was edited by Elsevier Language Editing Services.

Kind regards,

Nancy Jayaraj

**Elsevier Webshop Support**
